# Supplementary material
Source: Springer Nature journal article supplement (https://www.springermedizin.de/resource/supplementary/12905_2010_269_MOESM1_ESM.pdf/9518342)
Supplement: MOESM1 [file 9518342]

**NHWS Sample**  
N=62,833

**Men in NHWS**  
n=30,100

**Women in NHWS**  
n=32,733

**Women Not Meeting  
Entry Criteria**  
<40 years or no diagnosis of  
osteoporosis or osteopenia  
n=29,457

**Study Sample**  
Age  $\geq 40$  years and diagnosis of  
osteoporosis or osteopenia  
n=3276

**Prescription Group**  
n=1800

**No Prescription Group**  
n=1476
